# Supplementary material for: Depression Is Associated with an Increased Risk of Subsequent Cancer Diagnosis: A Retrospective Cohort Study with 235,404 Patients
Source: MDPI journal article supplement (doi:10.3390/brainsci13020302), 2023-02-10
Supplement: s1 [file s1]

## Supplementary Material

**Table S1: Grouping of cancer diagnosis by ICD-10 codes.**

| Cancer group      | ICD-10 codes  |
|-------------------|---------------|
| gastro-intestinal | C16-C21       |
| lung              | C34           |
| skin              | C43-C44       |
| breast            | C50           |
| prostate          | C61           |
| urinary           | C64-68        |
| lymph/blood       | C81-96        |
| other*            | all else in C |

\*includes ovarian cancer

5 **Table S2: Sensitivity analysis of Hazard Ratio of cancer diagnosis by group, subgroup and type of cancer.**

| Group                             | Number of events           |                             | Comparative risk                                               |                      |      |         |
|-----------------------------------|----------------------------|-----------------------------|----------------------------------------------------------------|----------------------|------|---------|
|                                   | Patients with depression   | Patients without depression | Patients with depression vs. patients without depression (ref) |                      |      |         |
|                                   | N events (% <sup>1</sup> ) | N events (% <sup>1</sup> )  | HR                                                             | 96% CI (lower-upper) |      | p-value |
| any cancer diagnosis <sup>2</sup> | 3.6%                       | 3.2%                        | 1.14                                                           | 1.09                 | 1.19 | <.0001  |
| <b>by age group (in years)</b>    |                            |                             |                                                                |                      |      |         |
| 18-30                             | 0.4%                       | 0.3%                        | 1.16                                                           | 0.79                 | 1.69 | 0.4567  |
| 30-40                             | 0.7%                       | 0.5%                        | 1.35                                                           | 1.03                 | 1.78 | 0.0311  |
| 40-50                             | 1.5%                       | 1.1%                        | 1.33                                                           | 1.10                 | 1.60 | 0.0035  |
| 50-60                             | 2.9%                       | 2.3%                        | 1.26                                                           | 1.12                 | 1.41 | <.0001  |
| 60-70                             | 5.1%                       | 4.2%                        | 1.22                                                           | 1.12                 | 1.34 | <.0001  |
| 70-80                             | 7.6%                       | 6.5%                        | 1.18                                                           | 1.08                 | 1.29 | 0.0004  |
| 80-90                             | 9.2%                       | 8.2%                        | 1.15                                                           | 1.06                 | 1.26 | 0.0014  |
| >90                               | 8.1%                       | 7.2%                        | 1.12                                                           | 0.93                 | 1.36 | 0.2231  |
| <b>by sex</b>                     |                            |                             |                                                                |                      |      |         |
| female                            | 3.6%                       | 2.9%                        | 1.22                                                           | 1.15                 | 1.29 | <.0001  |
| male                              | 3.6%                       | 3.5%                        | 1.04                                                           | 0.97                 | 1.11 | 0.3104  |

1: percentage of events calculated as number of patients with at least one event divided by all patients within subgroup (by age, sex, type of cancer)

2: any cancer diagnosis includes cancers of the breast, lung, prostate, skin, digestive system including stomach and colon, bladder and kidneys, female reproductive organs including uterus, cervix, ovaries, lymph and blood, and primary cancers of known location as well as malignant secondary of unknown primary origin

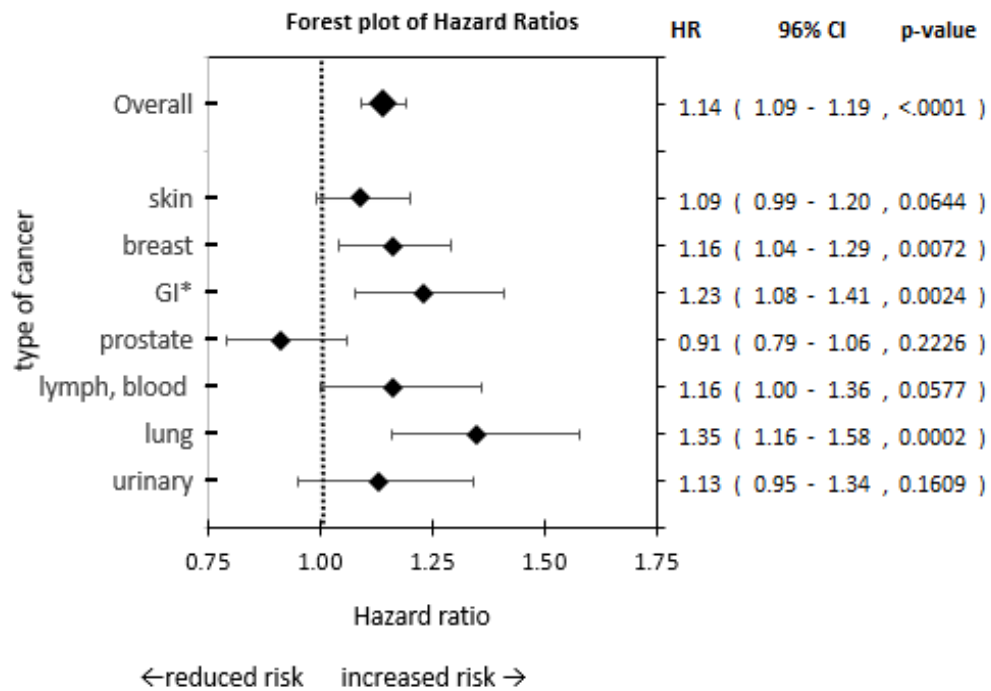

**Figure S1: Forest plot of Hazard Ratios based on sensitivity analysis.**

Risk of cancer diagnosis was compared between patients with depression and patients without depression (ref) across subgroups by cancer type. Any cancer diagnosis within the first 12 months after index date was censored.

\*GI: gastro-intestinal
